# Supplementary material for: Micro RNA-124a Regulates Lipolysis via Adipose Triglyceride Lipase and Comparative Gene Identification 58
Source: Int J Mol Sci. 2015 Apr 16;16(4):8555–68. doi: 10.3390/ijms16048555 (PMC4425096; doi:10.3390/ijms16048555)
Supplement: Supplementary file 1 [file ijms-16-08555-s001.pdf]

# Supplementary Information

Table S1. Primers used.

| Gene             | Forward Primer        | Reverse Primer        |
|------------------|-----------------------|-----------------------|
| <i>Atgl</i>      | TCGTGTTTCAGACGGAGAGAA | CAGACATTGGCCTGGATGAG  |
| <i>Cgi-58</i>    | TTGCAGGACCTTTTGGGTTA  | TCACCGTGTCATCTTCAAACA |
| <i>G0S2</i>      | TCTCTTCCCAGTGCACCCTA  | TCAGCTCCTGCACACTTTCC  |
| <i>Mgl</i>       | GGTCAATGCAGACGGACAGT  | AGCTCCATGGGACACAAAGA  |
| <i>Perilipin</i> | CCACCTGGAGGAAAAGATCC  | CCACCTGGAGGAAAAGATCC  |

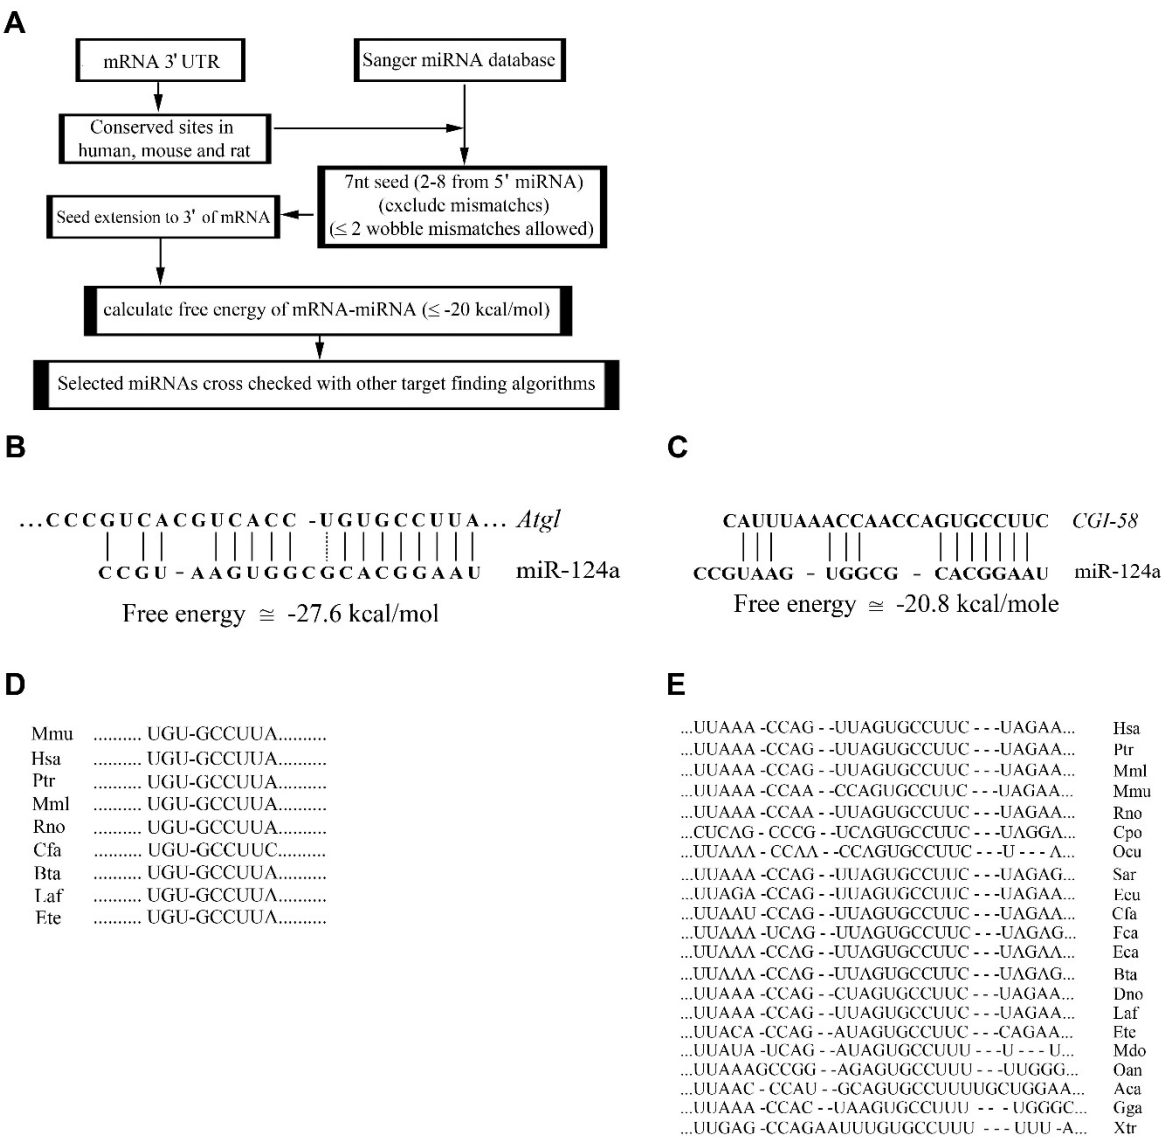

**Figure S1.** *In silico* analysis for miRNAs targeting ATGL and CGI-58 (also see Figure 1). (A) Algorithm used to search for a potential miRNA regulating the expression of lipases and regulatory proteins; (B,C) miR-124a has a potential target region in the 3'UTR of *Atgl* (B) and *Cgi-58* (C). Free energy of binding was calculated by RNA-hybrid; (D,E) The seed sequence in the 3'UTR of *Atgl* (D) as well as *Cgi-58* (E) is conserved across many species as shown by Clustalx global alignment analysis.

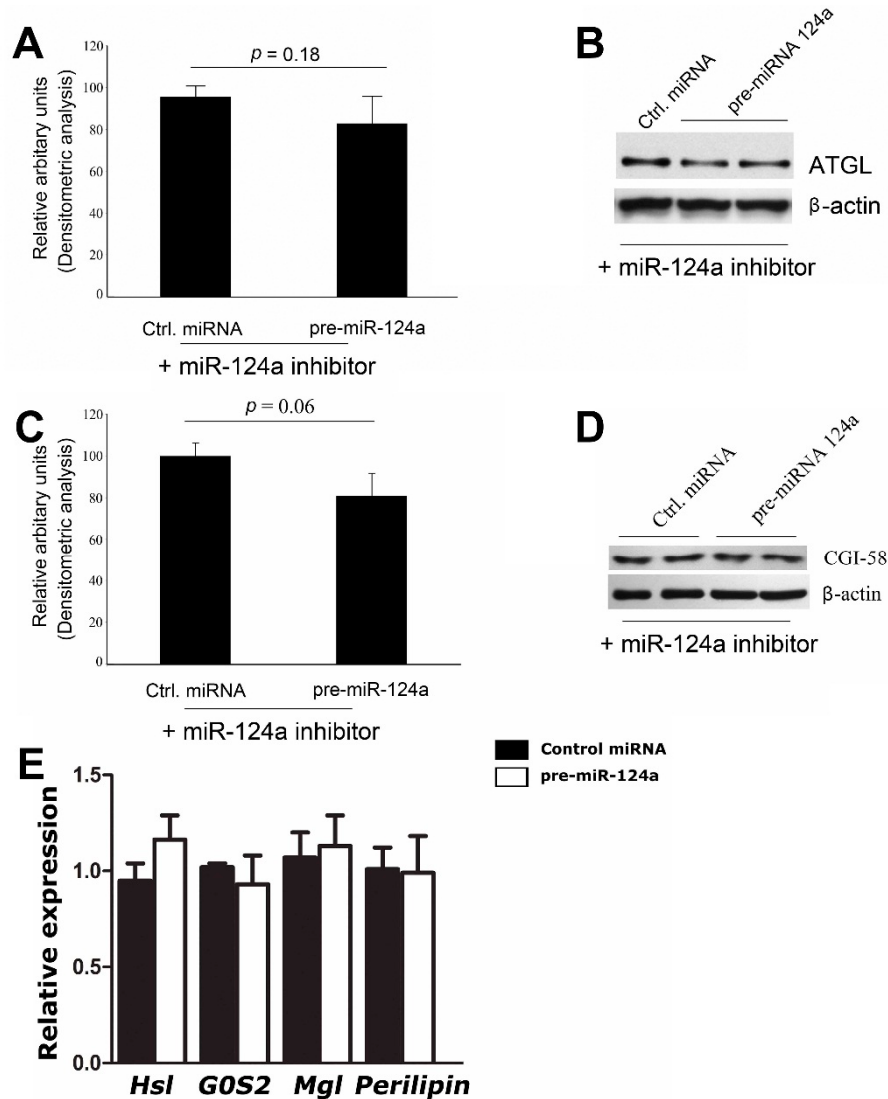

**Figure S2.** miR-124a specifically alter the expression of ATGL and CGI-58 without affecting the expression of other genes involved in lipid metabolism (Also see Figure 1). (A,B) ATGL western blot (B) analysis was performed from protein lysates of differentiated OP9 adipocytes 60 h after co-transfection with 100 nM pre-miR-124a or control miRNA and miR-124a inhibitor. The graph represents the densitometric analysis (A) of bands normalized to  $\beta$ -actin; (C,D) CGI-58 western blot (D) analysis was performed from protein lysates of differentiated OP9 adipocytes 60 h after co-transfection with 100 nM pre-miR-124a or control miRNA and miR-124a inhibitor. The graph represents the densitometric analysis (C) of bands normalized to  $\beta$ -actin; (E) mRNA expression of *Hsl*, *G0s2*, *Mgl* and *Perilipin* measured after 60 h of transfecting pre-miR-124a or control miRNA in OP9 adipocytes. Data are shown as average  $\pm$  standard deviation and represent 3 independent experiments.

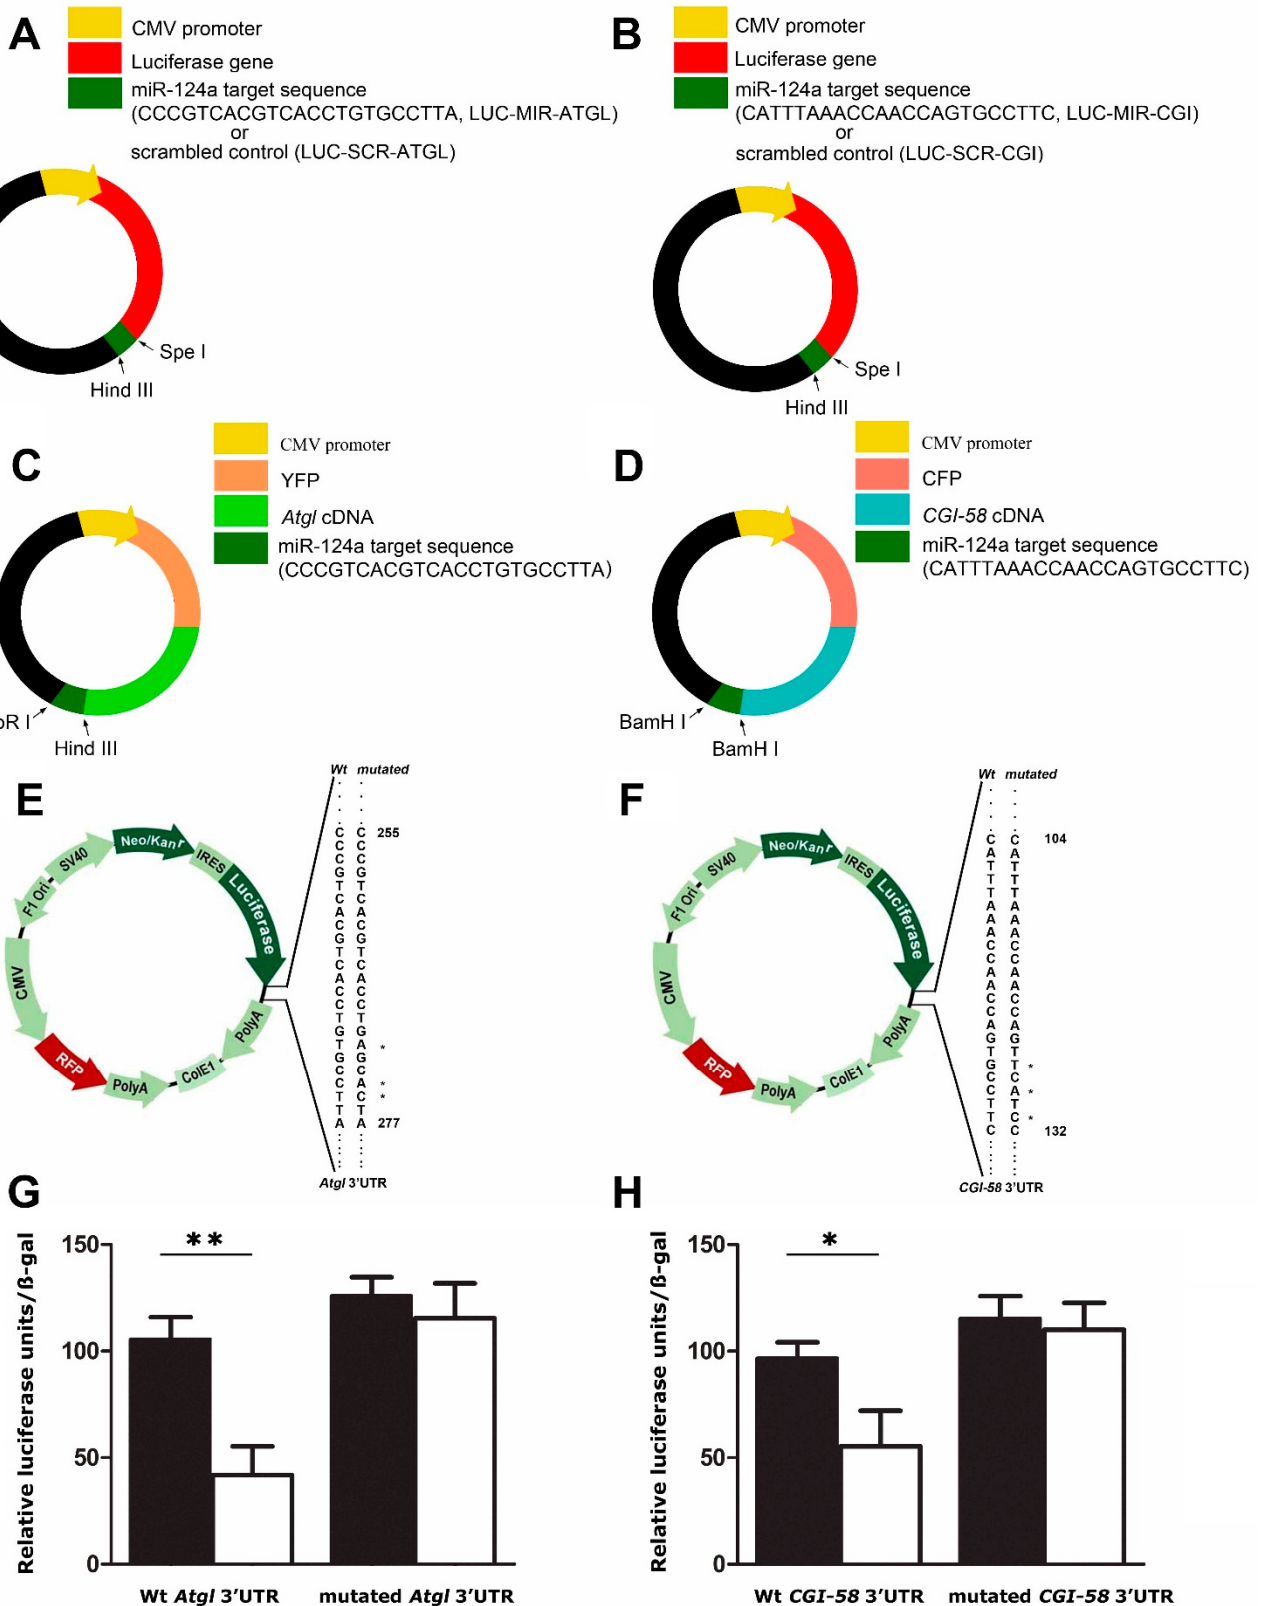

**Figure S3.** miR-124a regulates ATGL and CGI-58 expression via direct interaction with putative target site present in their respective 3'UTR (Also see Figure 2). **(A)** Vector diagram representing the plasmid construct containing the putative miR-124a target region from the *Atgl* 3'UTR (LUC-MIR-ATGL) or scrambled control (LUC-SCR-ATGL) in the 3'UTR of a luciferase gene; **(B)** Vector diagram representing the plasmid construct containing the

putative miR-124a target region from the *Cgi-58* 3'UTR (LUC-MIR-CGI) or scrambled control (LUC-SCR-CGI) in the 3'UTR of a luciferase gene; (C) Vector diagram representing the plasmid construct consisting of the putative miR-124a target region from *Atgl* 3'UTR in the 3'UTR of *Atgl* tagged with YFP (YFP-ATGL-miR); (D) Vector diagram representing the plasmid construct consisting of the putative miR-124a target region from 3'UTR of *Cgi-58* in the 3'UTR of *Cgi-58* tagged with CFP (CFP-CGI-miR); (E) Vector diagram representing the plasmid construct consisting of wild type or mutated (3 nucleotides mutated in the seed sequence represented by \*) 3'UTR *Atgl*; (F) Vector diagram representing the plasmid construct consisting of wild type or mutated (3 nucleotides mutated in the seed sequence represented by \*) 3'UTR *Cgi-58*; (G) Luciferase activity (relative units, normalized to  $\beta$ -gal activity) measured after 60 h of co-transfection of HeLa cells with luciferase reporter plasmid carrying *wt* 3'UTR or mutated (3 nucleotides mutated in the seed sequence) 3'UTR of *Atgl* along with control miRNA or pre-miR-124a; (H) HeLa cells were co-transfected with luciferase reporter plasmid carrying *wt* 3'UTR or mutated (3 nucleotides mutated in the seed sequence) 3'UTR of *Cgi-58* along with control miRNA or pre-miR-124a and luciferase activity was measured after 60 h. Values are presented as relative luciferase units normalized to  $\beta$ -gal activity. \*\*  $p < 0.01$ , \*  $p < 0.05$ .

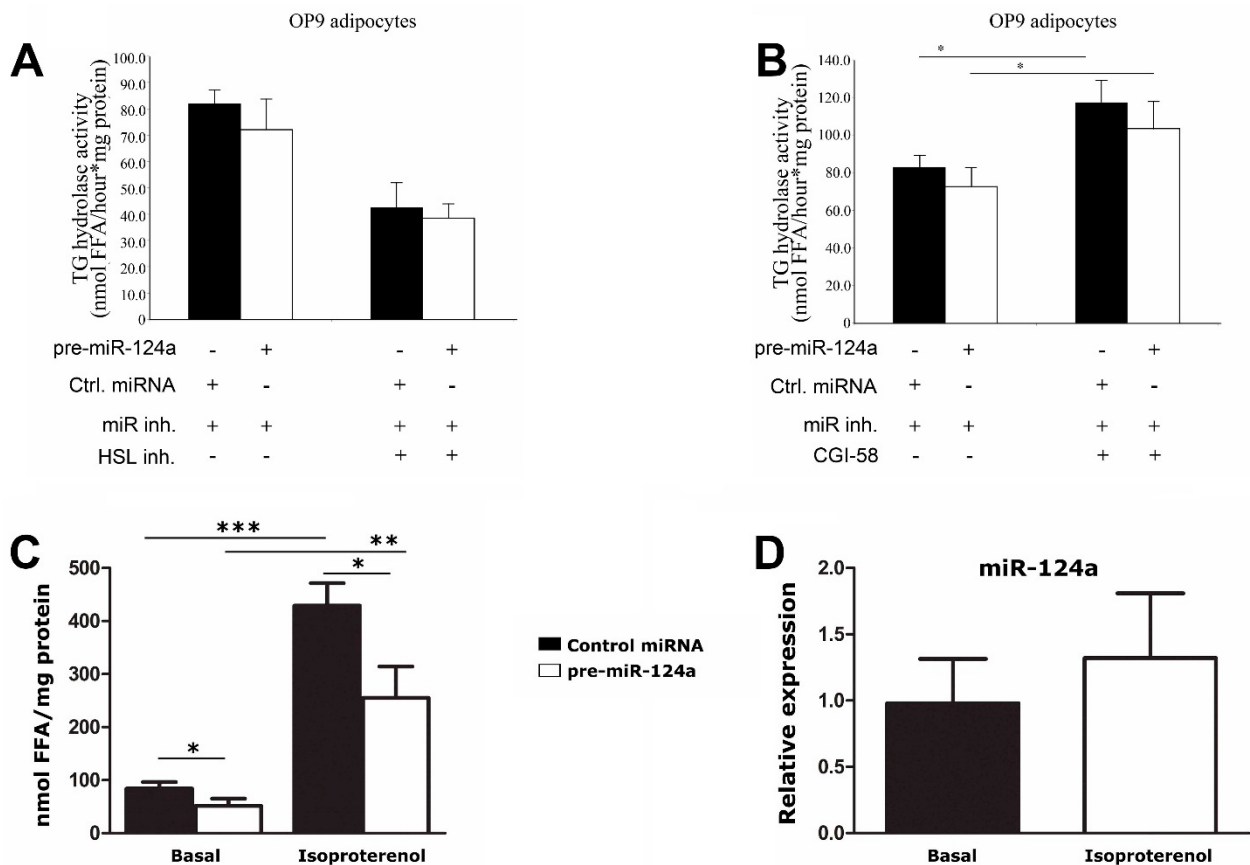

Figure S4. Cont.

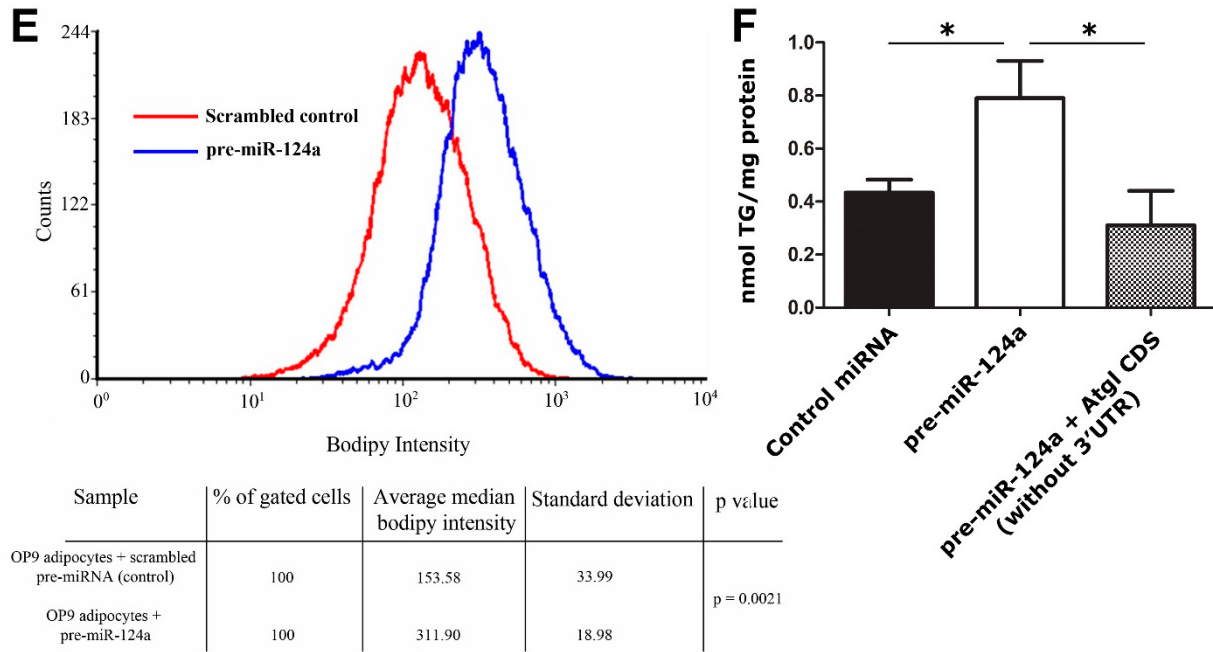

**Figure S4.** miR-124a decreases TG hydrolysis which can be blocked by using specific inhibitor of miR-124a (Also Figure 3). (A) OP9 adipocytes were transfected with either pre-miR-124a or control miRNA with miR-124a inhibitor. TG hydrolase activities from cytosolic protein fractions of adipocytes were analyzed in the presence or in the absence of 76-0079 (HSL inhibitor); (B) OP9 adipocytes were transfected with either pre-miR-124a or control miRNA with miR-124a inhibitor. TG hydrolase activities from cytosolic protein fractions of adipocytes were analyzed in the presence or in the absence of recombinant CGI-58 protein; (C) OP9 adipocytes were transfected with either pre-miR-124a or control miRNA. Free fatty acid release in the media was quantified by biochemically after 40 h under basal conditions or after 2 h isoproterenol activation and normalized to total protein in cell extracts; (D) Relative miR-124a expression in OP9 adipocytes in basal or isoproterenol activated state; (E) OP9 adipocytes transfected with either pre-miR-124a or control miRNA and stained with BODIPY 493/503 after 70 h and neutral lipid stores were analyzed by flow cytometry; and (F) OP9 adipocytes were transfected with either pre-miR-124a or control miRNA with or without a plasmid carrying *Atgl* coding sequence (without 3'UTR) and cellular triglyceride (TG) was quantified biochemically after 30 h. TG content was normalized to total protein in cell extracts. Data are shown as average  $\pm$  standard deviation and represent 3 independent experiments. \*\*\*  $p < 0.001$ , \*\*  $p < 0.01$ , \*  $p < 0.05$ .

## Abbreviations

Aca: Lizard; Bta: Cow; Cfa: Dog; Cpo: Guinea pig; Dno: Armadillo; Eca: Horse; Eeu: Hedgehog; Ete: Tenrec; Fca: Cat; Gga: Chicken; Gga: Chicken; Has: Human; Laf: Elephant; Mdo: Opossum; Mml: Rhesus; Mmu: Mouse; Oan: Platypus; Mml: Rhesus; Mmu: Mouse; Oan: Platypus; Ocu: Rabbit; Ocu: Rabbit; Ptr: Chimpanzee; Rno: Rat; Sar: Shrew; Xtr: Frog.
